# Supplementary material for: Size optimization of fire-extinguishing microcapsules fabricated via non-planar microfluidics and their performance study
Source: Royal Society of Chemistry journal article supplement (doi:10.1039/d5lc01058f), 2026-01-01
Supplement: d5lc01058f19.pdf [file d5lc01058f19.pdf]

## Supporting Information

### Size Optimization of Fire-Extinguishing Microcapsules Fabricated via Non-Planar Microfluidics and Their Performance Study

Ming Cao,<sup>†a</sup> Xiaoshan Jin,<sup>†a</sup> Meirong Yi,<sup>†ae</sup> Xiaoxiao Chen,<sup>ae</sup> Fangsheng  
Huang,<sup>b</sup> Zhiqiang Zhu,<sup>bc</sup> Shengyun Ji,<sup>d</sup> Ke Li,<sup>a</sup> Yichuan Dai<sup>\*a</sup> and  
Jianfeng Chen<sup>\*ae</sup>

(a. College of Advanced Manufacturing, Nanchang University, Nanchang,  
330031, China;

b. Institute of Advanced Technology, University of Science and  
Technology of China, Hefei, Anhui 230088, China

c. Department of Precision Machinery and Precision Instrumentation,  
University of Science and Technology of China, Hefei, Anhui 230026,  
China

d. Department of Biomedical Engineering, Washington University in St.  
Louis, One Brookings Drive St. Louis, MO 63130, USA

e. Chongqing Research institute of Nanchang University, Chongqing  
402660 China)

<sup>†</sup>These authors contributed equally to this work

\*Corresponding Authors

\*E-mail: Jianfeng Chen      [cjf@ncu.edu.cn](mailto:cjf@ncu.edu.cn)

\*E-mail: Yichuan Dai      [daiyc@ncu.edu.cn](mailto:daiyc@ncu.edu.cn)

## 1. Supporting Figures

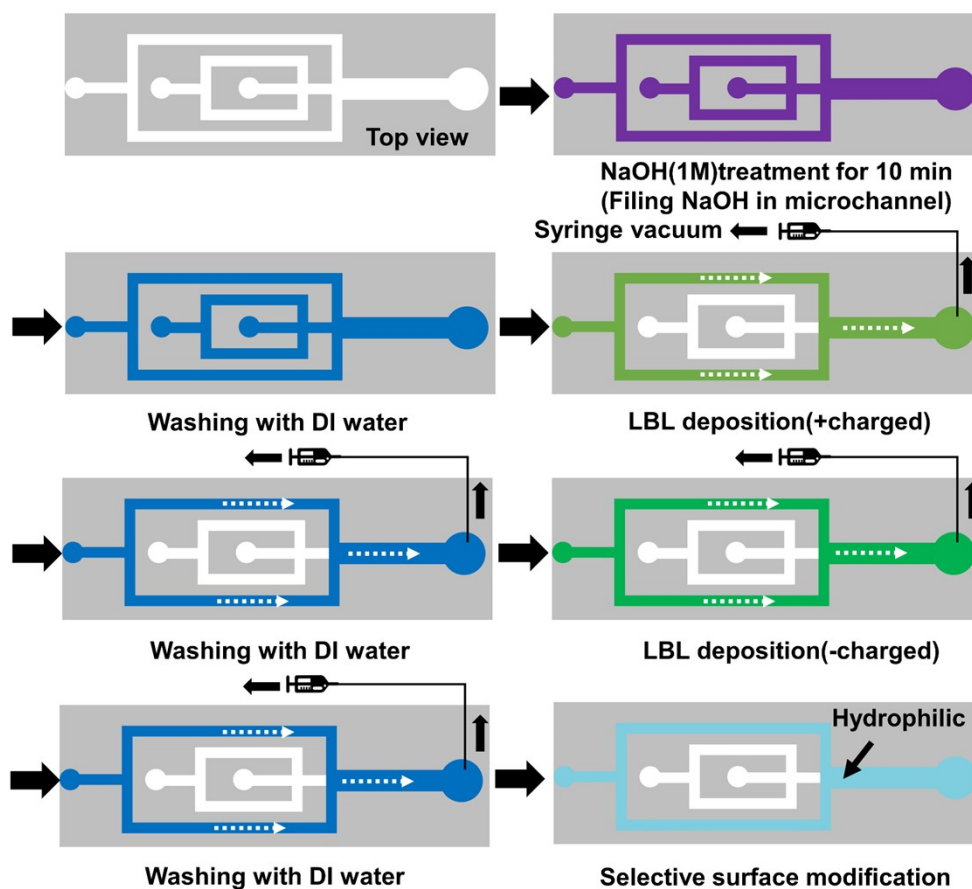

Fig. S1. Schematic diagram illustrating the detailed procedure for spatial patterning of surface wettability on PDMS microfluidic devices (concentrations of both polyelectrolyte solutions: PAH at pH 7.5 and PAA at pH 3.5, were 1 mg/mL).

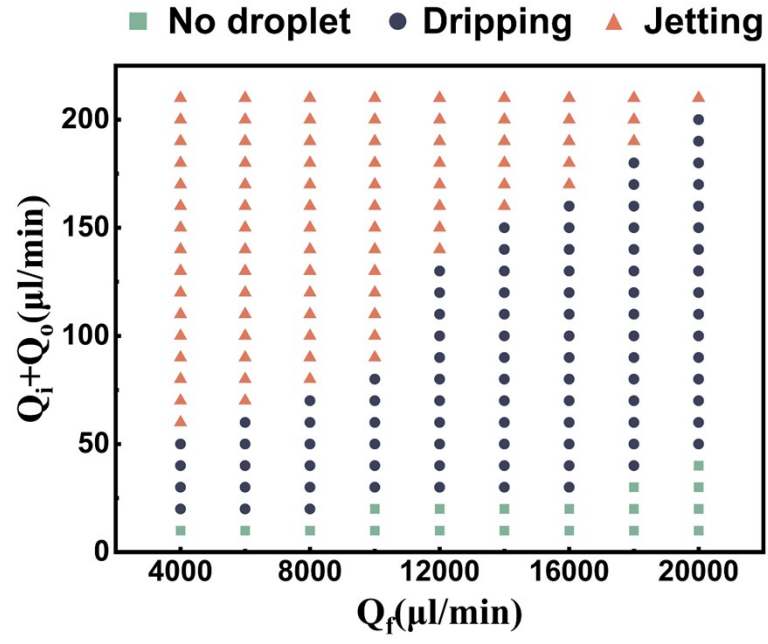

Fig. S2. Flow regime map of microcapsule generation. The operational regions (no droplet, dripping, and jetting) are plotted as a function of the driving phase flow rate ( $Q_f$ ) versus the combined dispersed phase flow rates ( $Q_i + Q_o$ ).

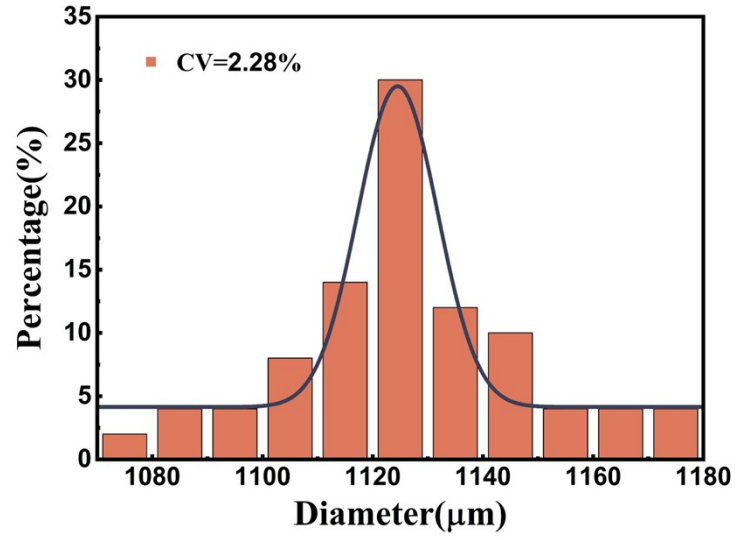

Fig. S3. Size distribution of microcapsules. (Inner phase flow rate  $Q_i=60\mu\text{L}/\text{min}$ , outer phase flow rate  $Q_o=60\mu\text{L}/\text{min}$ , driving phase flow rate  $Q_f=10000\mu\text{L}/\text{min}$ .)

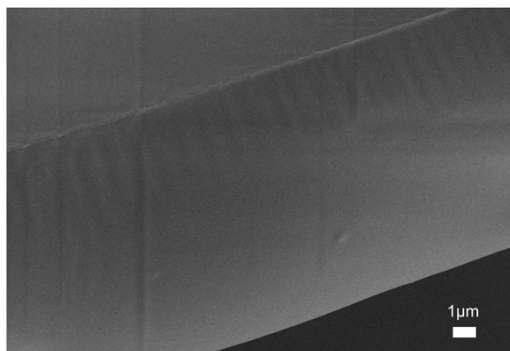

Fig. S4. High-magnification SEM micrograph of the microcapsule shell surface. The image reveals a highly dense, continuous, and smooth topography without any observable micropores, cracks, or pinholes, confirming the structural integrity and hermetic sealing capability of the shell. Scale bar: 1  $\mu\text{m}$ .

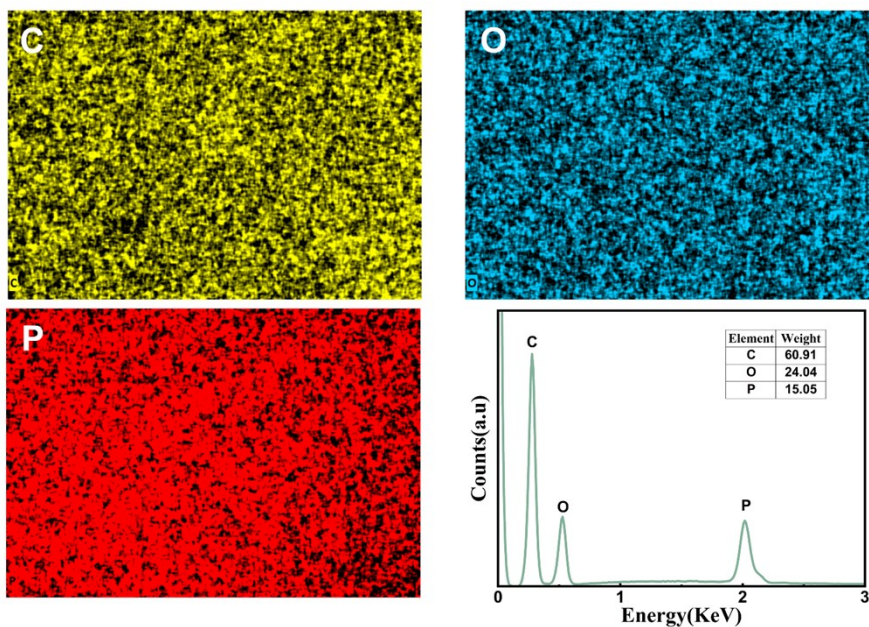

Fig. S5. EDS elemental mapping and corresponding spectrum of the microcapsule shell cross-section. The mapping images display the uniform distribution of Carbon (C), Oxygen (O), and Phosphorus (P) within the resin matrix, while the inset table lists the quantitative elemental weight percentages.

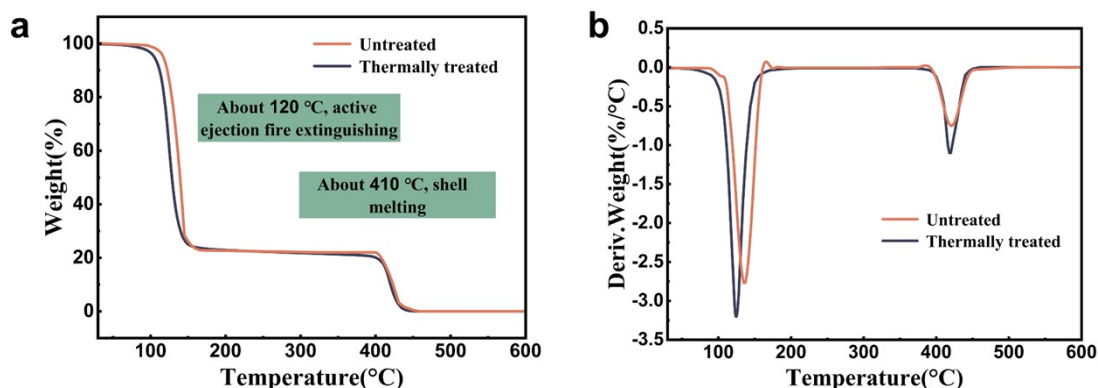

Fig. S6. Comparative thermal stability analysis of untreated and thermally treated microcapsules. (a) TGA and (b) DTG curves exhibiting the weight loss behaviors. The aged samples were subjected to an isothermal treatment at 75 °C for 600 min. The overlapping curves confirm that the accelerated aging process induced negligible loss of the core agent or degradation of the shell material.

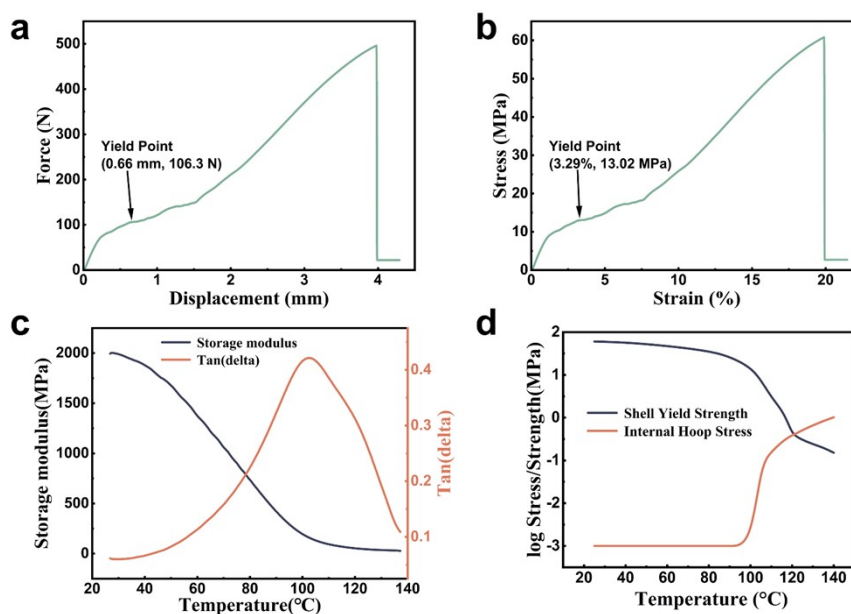

Figure S7. Mechanical characterization of the microcapsule shell material and theoretical rupture analysis. (a) Force-displacement curve and (b) the corresponding stress-strain curve of the cured photoresin film, indicating the mechanical yield point at room temperature. (c) Dynamic Mechanical Analysis (DMA) profiles showing the temperature-dependent evolution of storage modulus and tan delta. (d) Theoretical failure model plotting the calculated internal hoop stress (orange line) against the temperature-dependent yield strength of the shell (blue line). The intersection point at approximately 120 °C corresponds to the predicted rupture onset temperature.

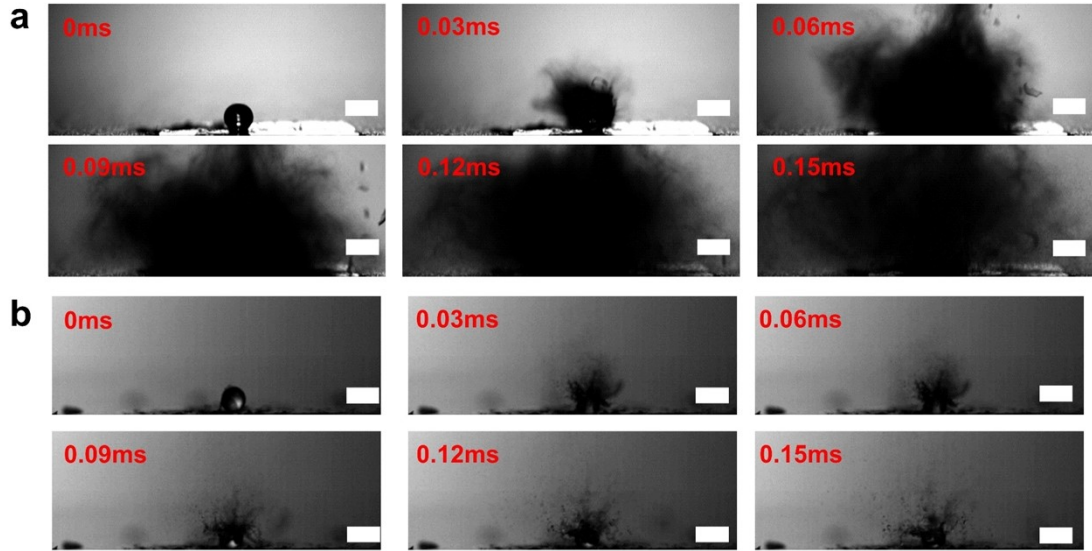

Fig. S8. High-speed camera sequences comparing the thermally triggered rupture behaviors. (a) Microcapsule loaded with 4wt% SDBS, exhibiting a "Flash Atomization Regime" characterized by the rapid expansion of a fine mist cloud. (b) Microcapsule with a pure water core (without surfactant), displaying a "Splashing Regime" with limited expansion and coarse droplet formation. Scale bar: 1 mm.

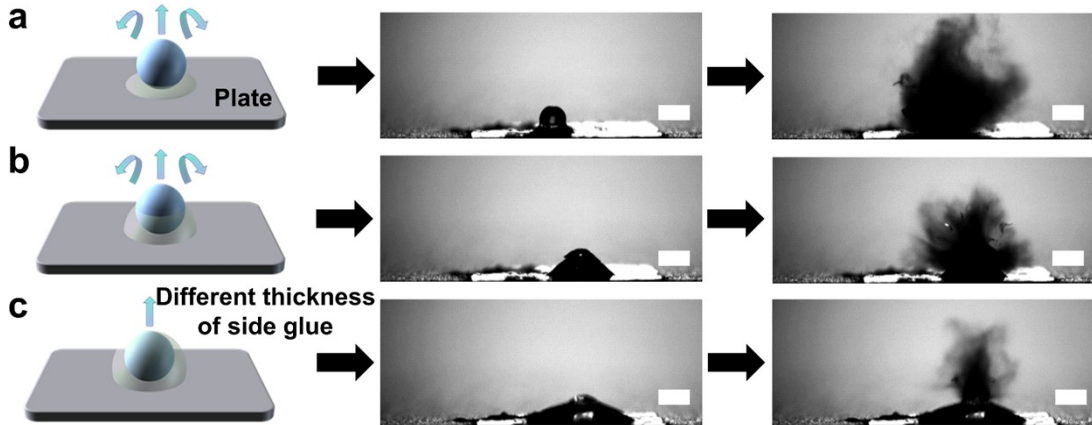

Fig. S9. As shown in (a), (b), and (c), the release range of the microcapsules decreases with increasing adhesive thickness. The spatial release behavior of the microcapsules under different adhesive thicknesses was captured using high-speed photography. Scale bar: 1 mm.



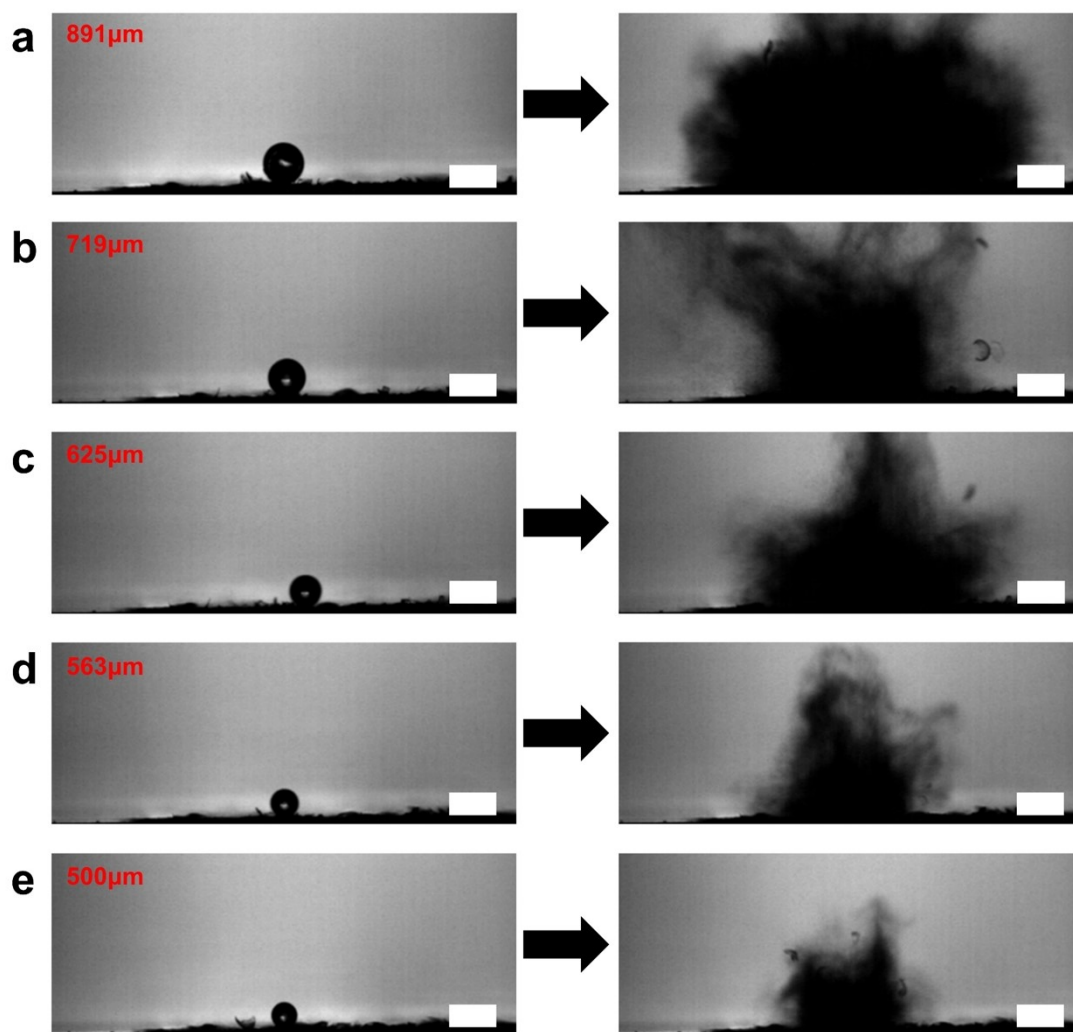

Fig. S10. As shown in (a)–(e), the release range of the water-based microcapsules increases with larger microcapsule diameter. The spatial release behavior of microcapsules with different sizes was captured using high-speed photography. Scale bar: 1 mm.



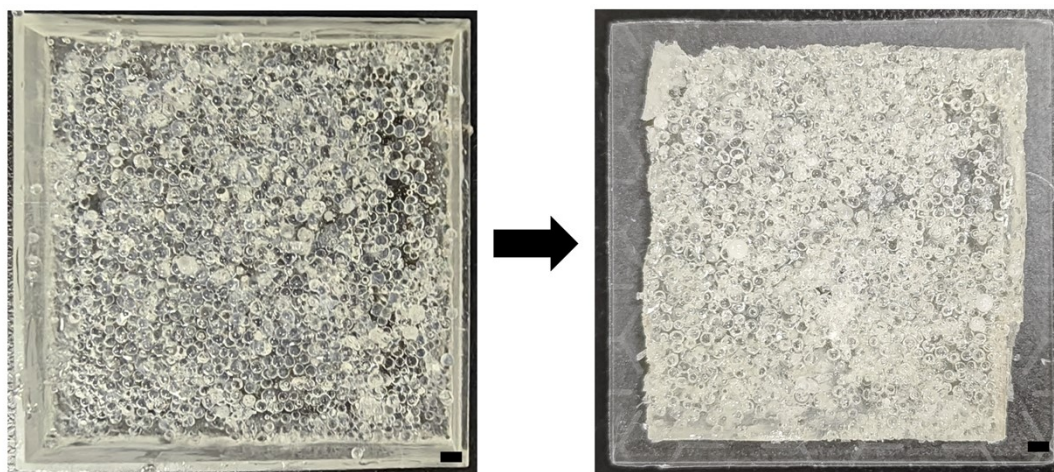

Fig. S11. Photograph of the fire-extinguishing patch. Scale bar: 1 mm.

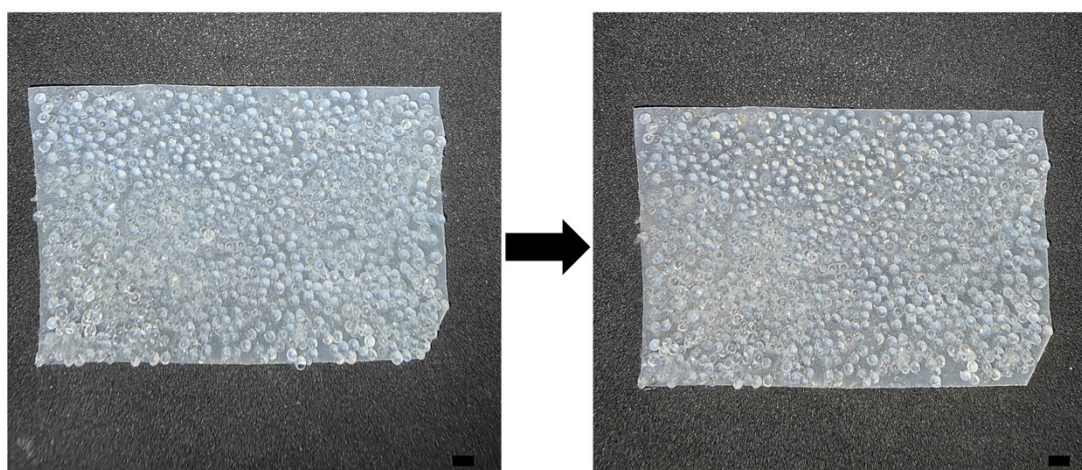

Figure S12. Digital photographs of the fire-extinguishing patch (a) before and (b) after the mechanical vibration test (600 rpm, 60 min). The patch maintained a mass retention of 97.5%. The minor detachment observed at the edges is attributed to the disruption caused by manual cutting (edge effect), while the main functional area remained intact.

**(a) Extinguishing distance of 1 cm:**

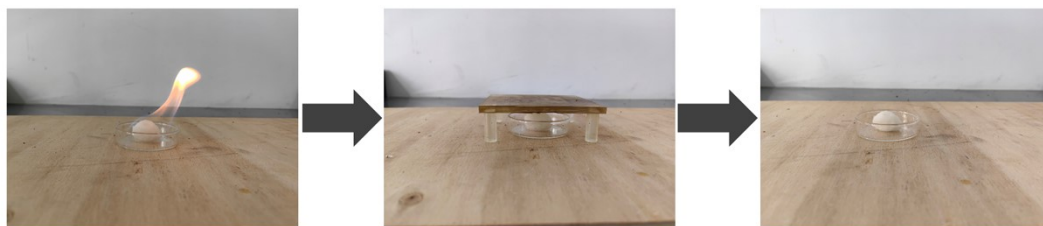

**(b) Extinguishing distance of 2 cm:**

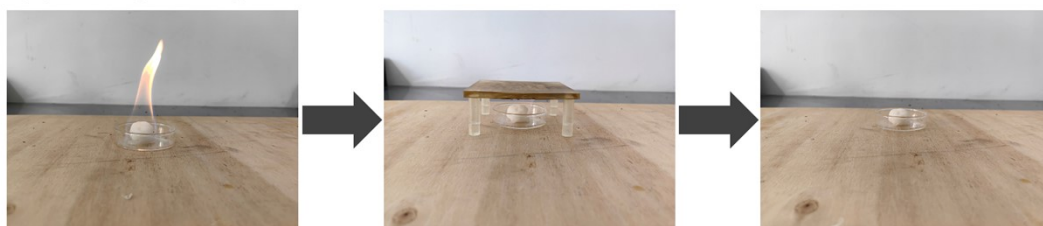

**(c) Extinguishing distance of 3 cm:**

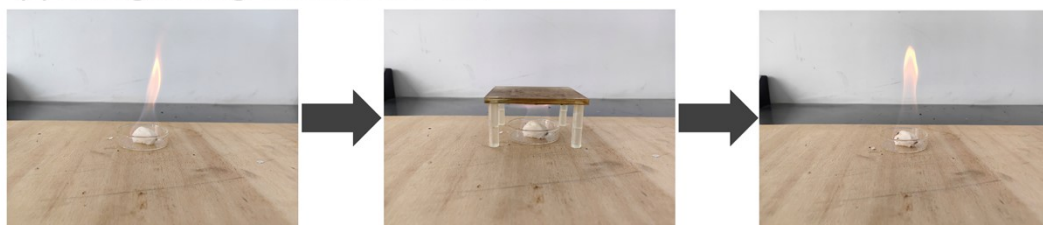

Fig. S13. Fire suppression performance of the microcapsule-based patch at different extinguishing distances: (a) 1 cm. (b) 2 cm. (c) 3 cm.

## 2. Derivation of the Shell Thickness Formula for Water-Based Microcapsules

### 2.1. Physical model assumptions

The inner phase (core material) with flow rate  $Q_i$  forms the core (a sphere of diameter  $d_c$ ).

The outer phase (shell precursor) with flow rate  $Q_o$  forms the shell (encapsulating the core), with total diameter  $D$ . The shell thickness is defined as:

$$d = \frac{D - d_c}{2} \quad (\text{S1})$$

Within the same time period  $t$ , the volume of the core is:

$$V_i = Q_i \cdot t \quad (\text{S2})$$

and the volume of the shell is:

$$V_o = Q_o \cdot t \quad (\text{S3})$$

Thus, the ratio of the volumes satisfies:

$$\frac{V_i}{V_o} = \frac{Q_i}{Q_o} \quad (\text{S4})$$

### 2.2. Combination of geometric relations and volume conservation

The volume of the core is given by:

$$V_i = \frac{4}{3} \pi \left( \frac{d_c}{2} \right)^3 \quad (\text{S5})$$

The total volume (core + shell) is:

$$V_{total} = \frac{4}{3} \pi \left( \frac{D}{2} \right)^3 \quad (\text{S6})$$

The volume of the shell is therefore:

$$V_o = V_{total} - V_i = \frac{4}{3} \pi \left[ \left( \frac{D}{2} \right)^3 - \left( \frac{d_c}{2} \right)^3 \right] \quad (\text{S7})$$

Combining with the volume ratio derived earlier in Eq S4, and simplifying, yields:

$$\left( \frac{d_c}{D} \right)^3 = \frac{Q_i}{Q_i + Q_o} \Rightarrow d_c = D \cdot (Q_i / (Q_i + Q_o))^{1/3} \quad (\text{S8})$$

### 2.3. Derivation of shell thickness formula

Substitute the core diameter  $d_c$  from Eq. S8 into the definition of shell thickness given in Equation (S1) yields:

$$d = \frac{D}{2} \cdot [1 - (Q_i / (Q_i + Q_o))^{1/3}] \quad (\text{S9})$$

### **3. Supporting Videos**

Movie.S1. Candle Extinguishment Experiment.

Movie.S2. High-Speed Recording of Microcapsule Bursting Process.

Movie.S3. High-Speed Recording of Candle Extinguishment Using Microcapsules.

Movie.S4. Fire Extinguishing Experiment with Thermally Responsive Patch.

## 4. Supplementary Table

Table S1. Comparison with previous reports on fire-extinguishing microcapsules.

| No. | Preparation Method           | Shell / Core Materials                                                                   | Size Distribution | Trigger Temp. (°C) | Long-Term Stability | Loading Tunability   | EE (wt%) | Application                          | Performance                                                                                                                                             | Ref. |
|-----|------------------------------|------------------------------------------------------------------------------------------|-------------------|--------------------|---------------------|----------------------|----------|--------------------------------------|---------------------------------------------------------------------------------------------------------------------------------------------------------|------|
| 1   | Interfacial polycondensation | PMMA / DMTP                                                                              | Polydisperse      | 95                 | 5% loss after 12 h  | Fixed by Formulation | -        | Battery separator (PE) + electrolyte | PMMA-coated PE separator: Max. temp. during TR reduced from 72.3 °C to 56.2 °C ;<br>Microcapsule-coated PE + electrolyte: Max. temp. reduced to 37.2 °C | [1]  |
| 2   | Coacervation                 | Melamine-urea-formaldehyde / Perfluoro(2-methyl-3-pentanone) and heptafluorocyclopentane | Polydisperse      | 128.9              | -                   | Fixed by Formulation | 43.12    | Li-ion battery aluminum plastic film | Battery temperature decreased from 800 °C to 30 °C within 15 s                                                                                          | [2]  |
| 3   | Coacervation                 | Double-layered                                                                           | Polydisperse      | 130–140            | MC: 14% loss        | Fixed by             | 40       | Electrical                           | Flame extinguished                                                                                                                                      | [3]  |

|   |                            |                                                       |                       |         |                                                   |                      |       |                        |                                                                                                                                                                                                   |     |
|---|----------------------------|-------------------------------------------------------|-----------------------|---------|---------------------------------------------------|----------------------|-------|------------------------|---------------------------------------------------------------------------------------------------------------------------------------------------------------------------------------------------|-----|
|   | and in situ polymerization | polymer shell (UF resin) / MNFB                       |                       |         | after 100 days; DL-MC: 0.005% loss after 100 days | Formulation          |       | fire                   | naturally after 61 s; Extinguishing times for MC and DL-MC were 36 s and 27 s, respectively                                                                                                       |     |
| 4 | Vacuum impregnation        | Hollow mesoporous silica / TEP and PCM (stearic acid) | Relatively Uniform    | 150     | -                                                 | Fixed by Formulation | 38–45 | Battery separator (PP) | PP separator: 33.8% residual weight after 4 s burning; SiO <sub>2</sub> -coated: extinguished within 3 s (56.2% residual); PCM-TEP@SiO <sub>2</sub> /PP: extinguished within 1 s (84.6% residual) | [4] |
| 5 | Coacervation               | Crosslinked PMMA (x-PMMA) / TEP                       | Polydisperse          | 150–215 | -                                                 | Fixed by Formulation | -     | Battery separator (PE) | Ref pouch: Voltage dropped to 0 V within 8 min; Pouch cell with F-CCS (CE73): Voltage remained stable after 25 min                                                                                | [5] |
| 6 | Microfluidic flow-focusing | Photosensitive resin / Perfluorohexanone              | Strictly Monodisperse | 110     | -                                                 | Flow-rate Tunable    | 75    | Electrical sockets     | Fire in Type B socket was rapidly extinguished; Fire                                                                                                                                              | [6] |



|    |                                      |                                                                                 |                                  |     |                         |                      |                |                                           |                                                                                                           |      |
|----|--------------------------------------|---------------------------------------------------------------------------------|----------------------------------|-----|-------------------------|----------------------|----------------|-------------------------------------------|-----------------------------------------------------------------------------------------------------------|------|
|    |                                      |                                                                                 |                                  |     |                         |                      |                |                                           | in Ref socket continued to burn                                                                           |      |
| 7  | In situ polymerization               | Prepolymer / Perfluorohexanone and 1,1,1,2,2,3,3,4,4-nonafluoro-4-methoxybutane | Polydisperse                     | -   | -                       | Fixed by Formulation | 40             | NCM18650 battery surface                  | Coated 18650 NCM battery: Delayed TR onset by 250 s and even cut off the TRP                              | [7]  |
| 8  | In situ polymerization               | Melamine, urea, formaldehyde / Hydrates                                         | Polydisperse                     | 100 | -                       | Fixed by Formulation | -              | Electrolyte of 1 Ah NCM/Gr 811 pouch cell | Adding only 0.25 g microcapsules increased TR trigger temp. by 16.2 °C and reduced max. temp. by 117.5 °C | [8]  |
| 9  | Liquid-driven co-flow microfluidics  | Flame-retardant photosensitive resin / 3 wt% SDBS aqueous solution              | Strictly Monodisperse (CV=2.29%) | 130 | -                       | Flow-rate Tunable    | 26.5, 48, 71.6 | Electrical sockets                        | Fine water mist microcapsules rapidly extinguished flames within 1ms                                      | [9]  |
| 10 | Low-temperature complex coacervation | Gelatin, sodium polyphosphate (SP) and glutaraldehyde / Perfluorohexanone       | Polydisperse                     | 130 | 4.45% loss after 1 year | Fixed by Formulation | 82.27          | 107 silicone rubber                       | Surface temperature of silicone rubber decreased from                                                     | [10] |

|    |                          |                                                      |                                    |         |                                                                                                                             |                      |       |                 |                                                                  |           |
|----|--------------------------|------------------------------------------------------|------------------------------------|---------|-----------------------------------------------------------------------------------------------------------------------------|----------------------|-------|-----------------|------------------------------------------------------------------|-----------|
|    |                          |                                                      |                                    |         |                                                                                                                             |                      |       |                 | 485.9 °C to 183.7°C                                              |           |
| 11 | Coacervation             | Gelatin (GE) and Arabic gum (GA) / Perfluorohexanone | Polydisperse                       | 125     | 6.5% loss after 30 days                                                                                                     | Fixed by Formulation | 58.6  | -               | Shortened the self-extinguishing time from 82 s to 35 s          | [11]      |
| 12 | Microfluidics            | Photosensitive resin / Perfluorohexanone             | -                                  | 115–122 | -                                                                                                                           | Flow-rate Tunable    | 26.7  | Various patches | Completely extinguished ignited cotton ball flames within 2 s    | [12]      |
| 13 | In situ polymerization   | Polyurea / Perfluorohexanone                         | Polydisperse                       | 160–220 | 6.5% loss after 15 days                                                                                                     | Fixed by Formulation | 69–85 | Aerogel sheet   | Lowered the temperature rise rate from 41.5°C/s to 30.6°C/s      | [13]      |
| 14 | Non-planar Microfluidics | Photoresin / Water (with SDBS)                       | Strictly Monodisperse (CV = 2.28%) | 120     | Accelerated thermal aging tests were conducted to evaluate thermal stability. Microcapsules exhibited only 2.39% negligible | Flow-rate Tunable    | 85    | Various patches | Completely extinguished ignited alcohol cotton flames within 3 s | This Work |

|  |  |  |  |  |                                                                      |  |  |  |  |  |  |
|--|--|--|--|--|----------------------------------------------------------------------|--|--|--|--|--|--|
|  |  |  |  |  | mass loss after<br>continuous<br>exposure at 75<br>°C for 600<br>min |  |  |  |  |  |  |
|--|--|--|--|--|----------------------------------------------------------------------|--|--|--|--|--|--|

## References :

- [1] T. Yim, M.-S. Park, S.-G. Woo, H.-K. Kwon, J.-K. Yoo, Y. S. Jung, K. J. Kim, J.-S. Yu and Y.-J. Kim, *Nano Letters*, 2015, 15, 5059-5067.
- [2] W. Zhang, L. Wu, J. Du, J. Tian, Y. Li, Y. Zhao, H. Wu, Y. Zhong, Y.-C. Cao and S. Cheng, *Materials Advances*, 2021, 2, 4634-4642.
- [3] D. H. Lee, S. Kwon, Y. E. Kim, N. Y. Kim and J. B. Joo, *Materials*, 2022, 15.
- [4] Z. F. Liu, Y. T. Peng, T. Meng, L. Yu, S. Wang and X. L. Hu, *Energy Storage Materials*, 2022, 47, 445-452.
- [5] Y. Roh, D. Kim, D. H. Jin, D. Kim, C. L. Han, J. Choi, H. Lee, Y. G. Lee and Y. M. Lee, *Chemical Engineering Journal*, 2023, 474.
- [6] C. Li, H. R. Bian, D. Ding, F. S. Huang and Z. Q. Zhu, *Lab on a Chip*, 2024, 24, 904-912.
- [7] Y. B. Guo, X. J. Wang, J. J. Gao, Z. W. He, S. Yao, X. M. Zhou and H. J. Zhang, *Journal of Energy Storage*, 2024, 93.
- [8] J. J. Tong, Y. Peng, J. Liu, L. Wang, B. W. Hou, X. N. Feng and M. G. Ouyang, *Applied Physics Letters*, 2024, 125.
- [9] Y. J. Ren, P. Zhang, H. R. Bian, D. Ding, C. Li, N. Sang, J. C. Zhang, F. S. Huang and Z. Q. Zhu, *Chemical Engineering Journal*, 2025, 503.
- [10] J. C. Li, Y. D. Xing, H. M. Liu, L. W. Lu, T. Xue, X. Xu and F. Zhang, *Composites Communications*, 2025, 53.
- [11] Z. Y. Han, J. Yang, Y. Yu and X. R. Zhang, *Process Safety and Environmental Protection*, 2025, 193, 772-780.
- [12] Q. S. Pan, N. Sang, T. P. Zhou, C. Z. Wu, T. Si, F. S. Huang and Z. Q. Zhu, *Lab on a Chip*, 2025, 25, 2193-2204.
- [13] Y. Y. Xiao, Y. L. Pan, J. Yang, L. L. Li, Z. Zhao, X. D. Cheng and H. P. Zhang, *Chemical Engineering Journal*, 2025, 516.
