# Supplementary figures and images for: Size optimization of fire-extinguishing microcapsules fabricated via non-planar microfluidics and their performance study
Source: Royal Society of Chemistry journal article supplement (doi:10.1039/d5lc01058f), 2026-01-01

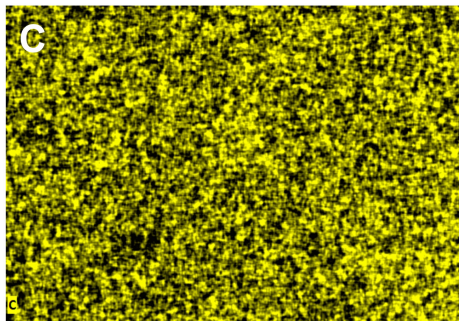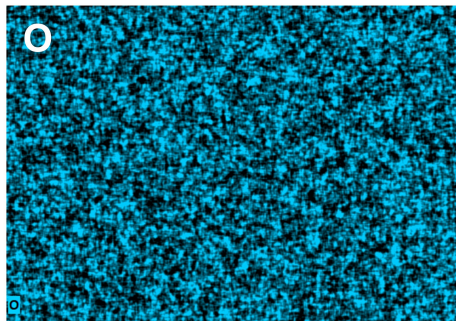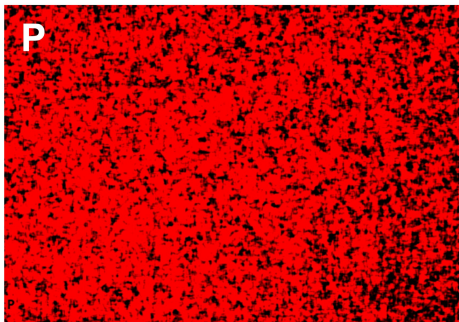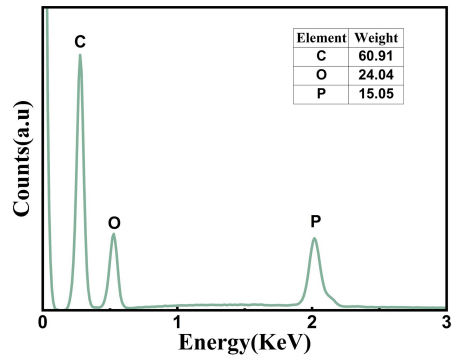

Supplement: d5lc01058f10.pdf [file d5lc01058f10.pdf]

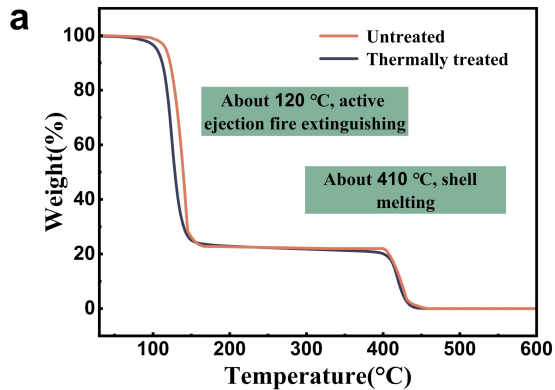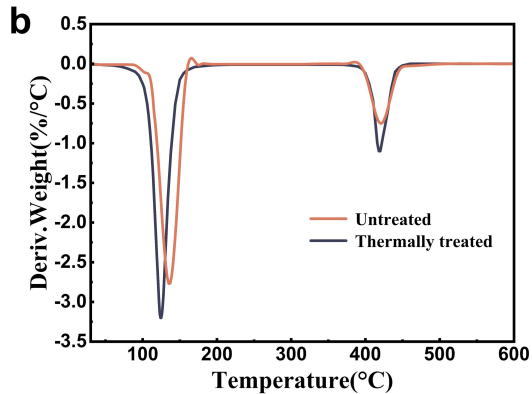

Supplement: d5lc01058f11.pdf [file d5lc01058f11.pdf]

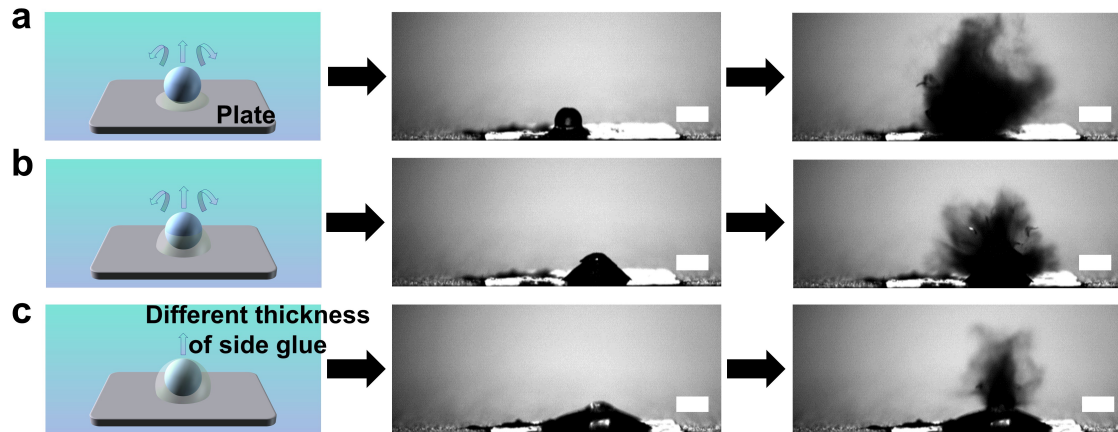

Supplement: d5lc01058f14.pdf [file d5lc01058f14.pdf]

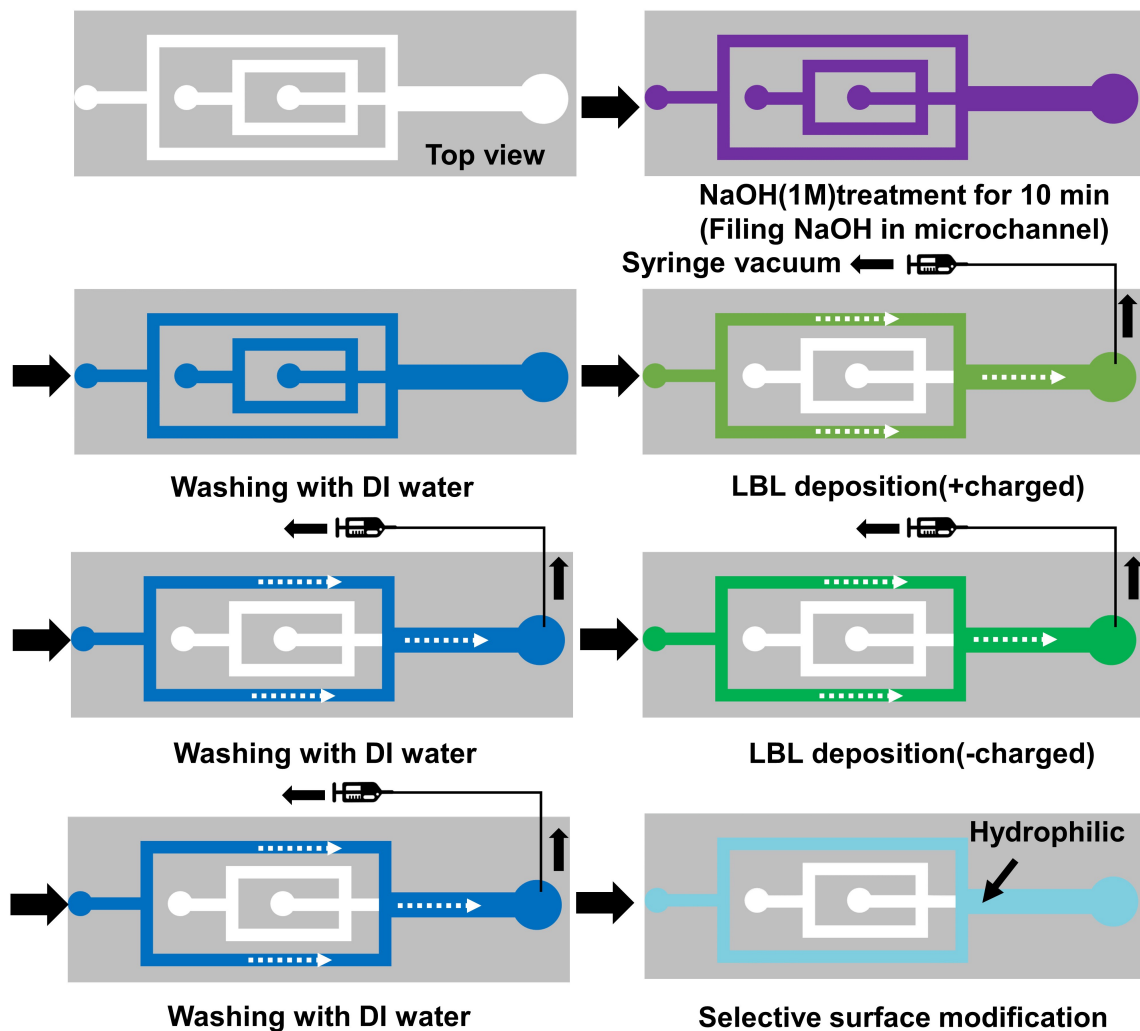

Supplement: d5lc01058f2.pdf [file d5lc01058f2.pdf]

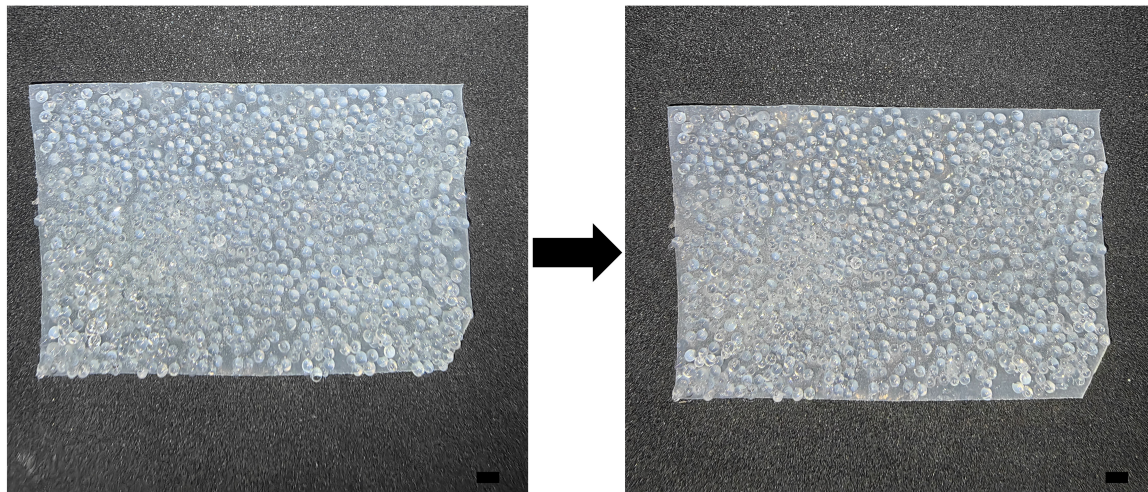

Supplement: d5lc01058f5.pdf [file d5lc01058f5.pdf]

**(a) Extinguishing distance of 1 cm:**

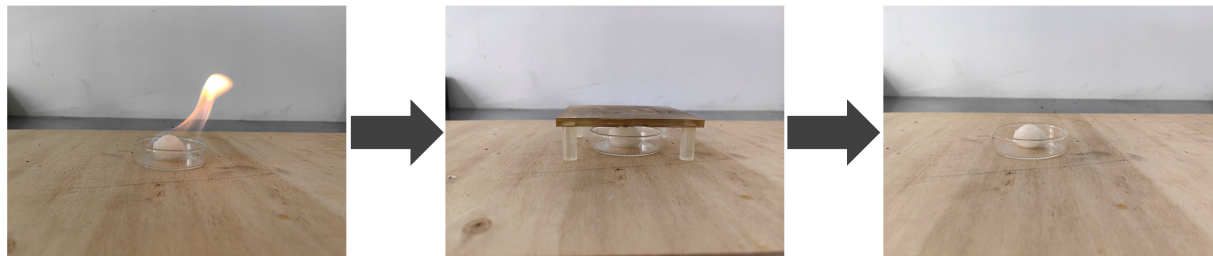

**(b) Extinguishing distance of 2 cm:**

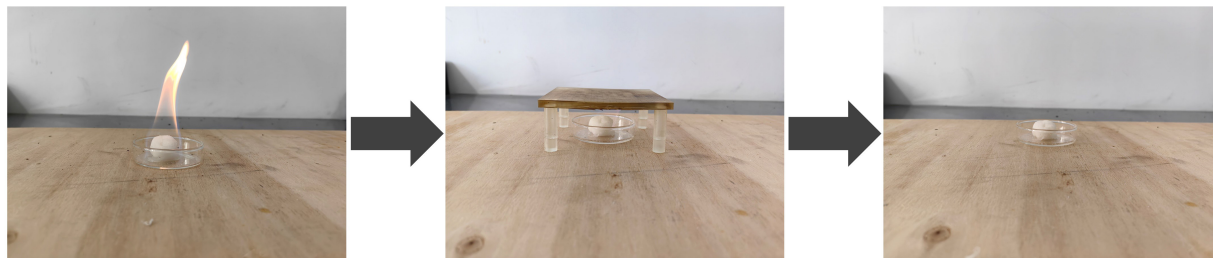

**(c) Extinguishing distance of 3 cm:**

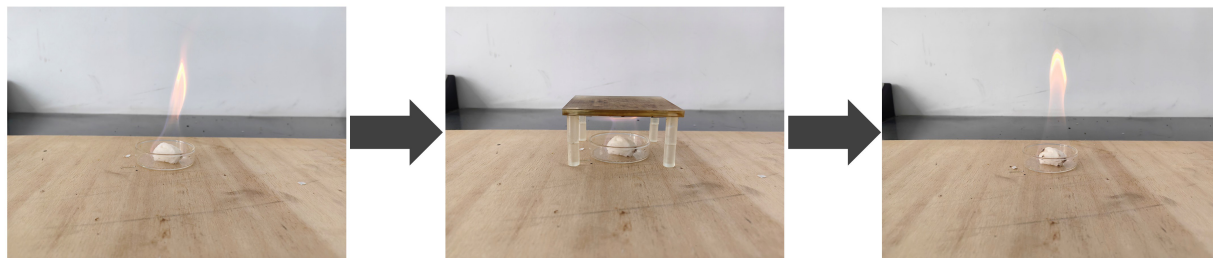

Supplement: d5lc01058f6.pdf [file d5lc01058f6.pdf]

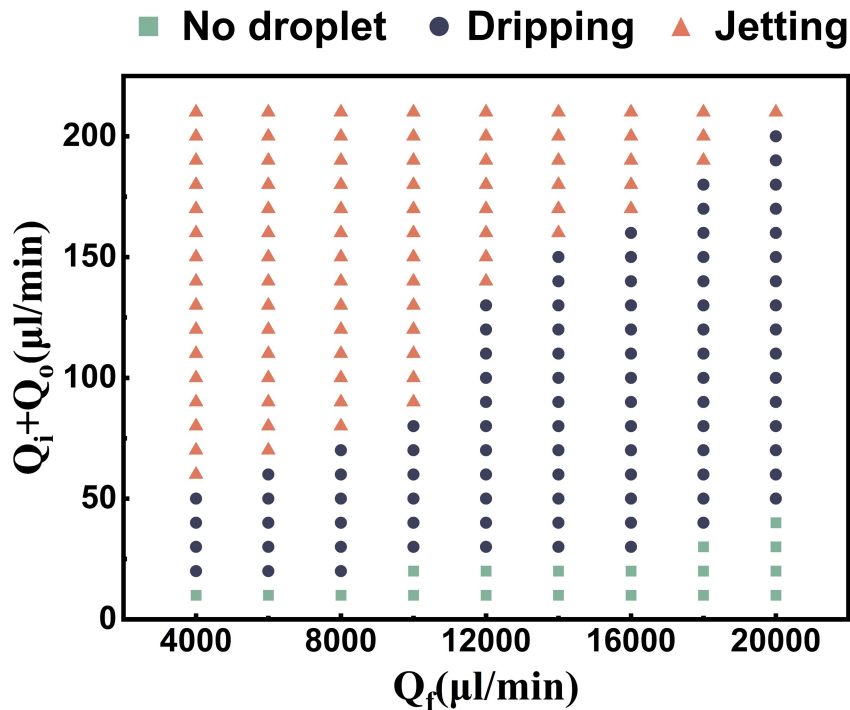

Supplement: d5lc01058f7.pdf [file d5lc01058f7.pdf]
